# Supplementary material
Source: Frontiers journal article supplement (https://www.frontiersin.org/articles/519227)

**Supplementary Figure S1.** Clustering results of 48 *Agarophyton vermiculophyllum* populations (611 samples) based on *cox1*. All samples have been assigned to five groups (colors). The vertical axis is probability, and the horizontal axis is population No. Each individual is depicted by a vertical bar that is partitioned into colored section. Population numbers in the horizontal axis are the same as in **Supplementary Table S1** and **Figure 1**.

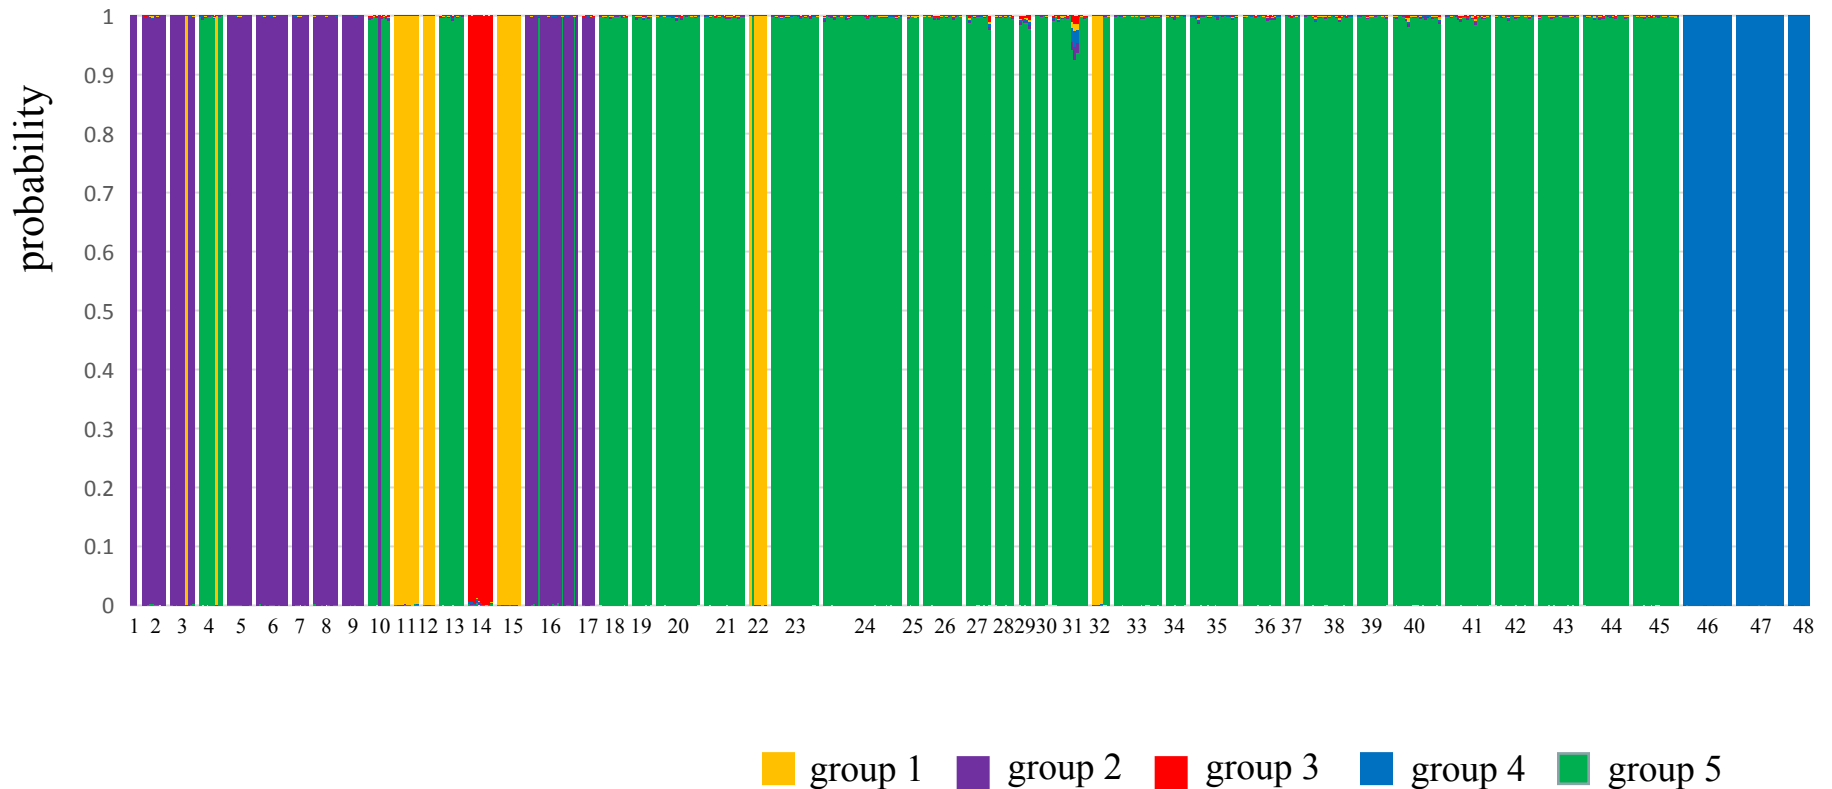

Supplement: Data_Sheet_1.PDF [file Data_Sheet_1.PDF]
