# Supplementary material
Source: Frontiers journal article supplement (https://www.frontiersin.org/articles/519227)
Supplement: Table_1.xlsx [file Table_1.xlsx]

## Sheet: Sheet1
Supplementary Table S1.Genetic diversity indexes of 48 Agarophyton vermiculophyllum populations, including abbreviation code, location, coordinates, habitat, population size (N), number of haplotypes (Nh), haplotype (H), polymorphic site (S), haplotype diversity (Hd), nucleotide diversity (π) and neutrality tests (Tajima's D and Fu's Fs) . The bold indicates the significance p<0.05. The asterisk …
NO.	Code	Location	Coordinate	Habitats	N(Nh)	H(n)	S	Hd	π×10-2	Tajima's D	Fu's Fs
RUSSIA					3(1)		0	0.0000 ± 0.0000	0.0000 ± 0.0000	0	0
1*	PRI	South Primorye	42° N,131° E	Unavailable	3(1)	H1(3)	0	0.0000 ± 0.0000	0.0000 ± 0.0000	0	0
JAPAN					133(11)		20	0.7236 ± 0.0356	0.3275 ± 0.1826	0.24126	2.24788
2	ABA	Abashiri, Hokkaido, Japan	44.05°N, 144.26°E	Sandy beach	10(1)	H1(10)	0	0.0000 ± 0.0000	0.0000 ± 0.0000	0	0
3	SHIN	Shinori, Hokkaido, Japan	41.77°N, 140.82°E	Sandy beach	10(2)	H1(9), H2(1)	8	0.2000 ± 0.1541	0.1318 ± 0.0963	-1.8734	3.33815
4	OGA	Oga, Akita, Japan	39.89°N, 139.85°E	Sandy beach	10(2)	H2(1), H3(9)	7	0.2000 ± 0.1541	0.1153 ± 0.0871	-1.83913	2.98462
5	MOU	Moune Bay, Sendai, Japan	38.90°N, 141.62°E	Rocky reef	10(1)	H1(10)	0	0.0000 ± 0.0000	0.0000 ± 0.0000	0	0
6	WG	Moune Bay, Sendai, Japan	38.89°N, 141.62°E	Rocky reef	13(2)	H1(12), H4(1)	1	0.1538 ± 0.1261	0.0127 ± 0.0212	-1.14915	-0.53714
7	SOU	Soukanzan, Sendai, Japan	38.35°N, 141.06°E	Rocky reef	7(2)	H1(5), H5(2)	1	0.4762 ± 0.1713	0.0392 ± 0.0438	0.55902	0.58867
8	MAT	Matsushima, Miyagi, Japan	38.35°N, 141.06°E	Sandy beach	10(2)	H1(9), H6(1)	1	0.2000 ± 0.1541	0.0165 ± 0.0251	-1.11173	-0.33931
9	TAN	Tanoami, Fukushima, Japan	37.12°N, 141.00°E	Sandy beach	9(1)	H1(9)	0	0.0000 ± 0.0000	0.0000 ± 0.0000	0	0
10	HAK	Hakui, Ishikawa, Japan	36.89°N, 136.78°E	Sandy beach	9(2)	H1(1), H7(8)	4	0.2222 ± 0.1662	0.0732 ± 0.0637	-1.60974	1.84369
11	KAT	Katsuura, Chiba, Japan	35.13°N, 140.29°E	Sandy beach	10(1)	H8(10)	0	0.0000 ± 0.0000	0.0000 ± 0.0000	0	0
12	TAT	Tateyama, Chiba, Japan	34.99°N, 139.84°E	Sandy beach	5(1)	H9(5)	0	0.0000 ± 0.0000	0.0000 ± 0.0000	0	0
13	MIT	Mitoma, Fukuoka, Japan	33.71°N, 130.42°E	Sandy beach	10(1)	H3(10)	0	0.0000 ± 0.0000	0.0000 ± 0.0000	0	0
14	SHI	Shimanto, Kochi, Japan	32.94°N, 133.00°E	Sandy beach	10(1)	H10(10)	0	0.0000 ± 0.0000	0.0000 ± 0.0000	0	0
15	ICHI	Ichiki, Kagoshima, Japan	31.71°N, 130.26°E	Sandy beach	10(1)	H11(10)	0	0.0000 ± 0.0000	0.0000 ± 0.0000	0	0
KOREA					213(15)		23	0.5282 ± 0.0401	0.1361 ± 0.0890	-1.55788	-4.21243
16	DONG	Donghae, Korea	37.49°N, 129.14°E	Sandy beach	22(3)	H1(19), H3(1), H7(2)	4	0.2554 ± 0.1161	0.0752 ± 0.0604	-0.47057	1.10391
17*	JUN	Junchun, Donghae, Korea	37.49°N, 129.14°E	Unavailable	5(3)	H1(3), H12(1), H13(1)	2	0.7000 ± 0.2184	0.0659 ± 0.0656	-0.97256	-0.8292
18*	TAE	Taean, Korea	36.47-36.94°N, 126.21-126.42°E	Unavailable	12(1)	H3(12)	0	0.0000 ± 0.0000	0.0000 ± 0.0000	0	0
19	PR	Pado-ri, Taean, Korea	36.75°N, 126.13°E	Sandy beach	8(1)	H3(8)	0	0.0000 ± 0.0000	0.0000 ± 0.0000	0	0
20	CT	Chaseokpo, Taean, Korea	36.70°N, 126.22°E	Sandy beach	18(1)	H3(18)	0	0.0000 ± 0.0000	0.0000 ± 0.0000	0	0
21	DAE	Daechon, Korea	36.32°N, 126.50°E	Sandy beach	17(1)	H3(17)	0	0.0000 ± 0.0000	0.0000 ± 0.0000	0	0
22	ODO	Odo, Korea	36.16°N, 129.40°E	Sandy beach	7(2)	H2(6), H3(1)	7	0.2857 ± 0.1964	0.1647 ± 0.1204	-1.55311	3.29584
23	BK	Buan, Korea	35.72°N, 126.60°E	Gravel	20(2)	H3(18), H14(2)	1	0.1895 ± 0.1081	0.0156 ± 0.0231	-0.59155	-0.0966
24	GYE	Gyeokpo, Korea	35.62°N, 126.48°E	Rocky reef	33(1)	H3(33)	0	0.0000 ± 0.0000	0.0000 ± 0.0000	0	0
25*	GEO	Geokpo, Booan, Korea	35.62°N, 126.47°E	Unavailable	5(1)	H3(5)	0	0.0000 ± 0.0000	0.0000 ± 0.0000	0	0
26	JK	Jindo island, Korea	34.52°N, 126.35°E	Rocky reef	16(1)	H3(16)	0	0.0000 ± 0.0000	0.0000 ± 0.0000	0	0
27	JIN	Jindo, Korea	34.42°N, 126.35°E	Rocky reef	10(3)	H15(8), H16(1), H17(1)	2	0.3778 ± 0.1813	0.0329 ± 0.0375	-1.40085	-1.16394
28*	DO	Jindo, Korea	34.26-34.42°N, 125.92-126.35°E	Unavailable	8(2)	H3(3), H15(5)	1	0.5357 ± 0.1232	0.0441 ± 0.0462	1.1665	0.86637
29*	CHU	Chujado, Jeju, Korea	33.96°N, 126.28°E	Unavailable	5(1)	H18(5)	0	0.0000 ± 0.0000	0.0000 ± 0.0000	0	0
30*	JEN	north of Jeju, Korea	33.50-33.51°N, 126.43-126.48°E	Unavailable	5(2)	H3(4), H19(1)	1	0.4000 ± 0.2373	0.0329 ± 0.0419	-0.8165	0.09021
31*	JEE	east of Jeju, Korea	33.33-33.56°N, 126.76-126.90°E	Unavailable	15(4)	H3(5), H19(3), H20(3), H21(4)	3	0.7905 ± 0.0514	0.0910 ± 0.0706	0.58719	-0.11562
32*	JES	south of Jeju, Korea	33.23-33.24°N, 126.22-126.24°E	Unavailable	7(2)	H3(3), H22(4)	8	0.5714 ± 0.1195	0.3766 ± 0.2409	2.10129	5.80789
CHINA					262（12）		17	0.5265 ± 0.0348	0.2100 ± 0.1252	-0.19914	0.39301
33	ZZ	Zhangzi Island, Dalian, China	39.04°N, 122.74°E	Rocky reef	20(1)	H3(20)	0	0.0000 ± 0.0000	0.0000 ± 0.0000	0	0
34	HS	Heishijiao, Dalian, China	38.87°N, 121.56°E	Rocky reef	8(1)	H3(8)	0	0.0000 ± 0.0000	0.0000 ± 0.0000	0	0
35	HN	Huangnichuan, Dalian, China	38.82°N, 121.56°E	Rocky reef	20(2)	H3(19), H23(1)	1	0.1000 ± 0.0880	0.0082 ± 0.0163	-1.16439	-0.8793
36	CD	Changdao, Yantai, China	37.94°N, 120.72°E	Rocky reef	16(1)	H3(16)	0	0.0000 ± 0.0000	0.0000 ± 0.0000	0	0
37	JM	Jiming Island, Weihai, China	37.45°N, 122.48°E	Rocky reef	6(1)	H3(6)	0	0.0000 ± 0.0000	0.0000 ± 0.0000	0	0
38	DC	Dongchu Island, Weihai, China	37.04°N, 122.56°E	Rocky reef	20(2)	H3(18), H24(2)	1	0.1895 ± 0.1081	0.0156 ± 0.0231	-0.59155	-0.0966
39	SD	Shi Island, Weihai, China	36.91°N, 122.41°E	Rocky reef	13(1)	H3(13)	0	0.0000 ± 0.0000	0.0000 ± 0.0000	0	0
40	LR	Shilaoren, Qingdao, China	36.09°N, 120.49°E	Sandy beach	20(4)	H3(14), H25(3), H26(1), H27(2)	3	0.5000 ± 0.1222	0.0460 ± 0.0438	-0.90875	-1.31961
41	YH	Yinhaiguoji, Qingdao, China	36.06°N, 120.42°E	Rocky reef	19(3)	H3(11), H28(2), H29(6)	2	0.5848 ± 0.0835	0.0540 ± 0.0487	0.3456	0.26842
42	YY	No.1 bathing beach, Qingdao, China	36.05°N, 120.34°E	Sandy beach	16(2)	H3(15), H30(1)	1	0.1250 ± 0.1064	0.0103 ± 0.0186	-1.16221	-0.7001
43	EY	No.2 bathing beach, Qingdao, China	36.05°N, 120.34°E	Rocky reef	17(1)	H3(17)	0	0.0000 ± 0.0000	0.0000 ± 0.0000	0	0
44	SY	No.3 bathing beach, Qingdao, China	36.05°N, 120.36°E	Rocky reef	19(1)	H3(19)	0	0.0000 ± 0.0000	0.0000 ± 0.0000	0	0
45	SS	Shengsi Island, Zhoushan, China	30.68°N, 122.44°E	Rocky reef	19(1)	H31(19)	0	0.0000 ± 0.0000	0.0000 ± 0.0000	0	0
46	ZP	Zhangpu, Zhangzhou, China	23.92°N, 117.77°E	Mud beach	20(1)	H32(20)	0	0.0000 ± 0.0000	0.0000 ± 0.0000	0	0
47	JHA	Jinhai Bank, Beihai, China	21.49°N, 109.11°E	Mud beach	20(1)	H33(20)	0	0.0000 ± 0.0000	0.0000 ± 0.0000	0	0
48	YT	Yintan, Beihai, China	21.45°N, 109.34°E	Mud beach	9(1)	H33(9)	0	0.0000 ± 0.0000	0.0000 ± 0.0000	0	0
TOTAL					611(33)		45	0.6651 ± 0.0200	0.2476 ± 0.1432	-1.4414	-10.1928
