# Supplementary material
Source: Frontiers journal article supplement (https://www.frontiersin.org/articles/519227)
Supplement: Table_2.XLSX [file Table_2.XLSX]

## Sheet: Sheet1
Supplementary Table S2. Polymorphic sites of 33 cox1 haplotypes in Agarophyton vermiculophyllu. The haplotype colors correspond to lineages identified in Figures 1-3. Yellow columns indicate nucleotide substitutions unique in one or a few lineages.
Haplotype	Number	Polymorphic sites
		35	110	156	167	227	233	251	281	287	296	314	317	329	341	377	380	382	398	413	439	443	485	503	590	594	611	638	722	767	770	798	806	860	945	947	989	1022	1031	1040	1097	1106	1119	1136	1154	1151
Hap_2	8	A	C	G	C	C	T	T	T	C	T	A	C	C	G	C	G	C	G	A	C	C	T	A	T	A	C	T	T	C	C	C	C	C	C	G	T	G	G	C	A	T	A	A	G	A
Hap_8	10	A	C	G	C	C	T	T	T	T	T	A	C	C	G	C	G	C	G	G	C	C	T	A	T	A	C	T	T	C	C	C	C	C	C	A	T	G	G	C	A	T	A	A	G	A
Hap_9	5	A	C	G	C	C	T	T	T	T	T	A	C	C	G	C	G	C	G	G	C	C	T	A	T	A	C	T	T	C	C	T	C	C	C	A	T	G	G	C	A	T	A	A	G	A
Hap_11	10	A	C	G	C	C	T	T	T	T	T	A	T	C	G	C	G	C	G	A	C	C	T	A	T	A	C	T	T	C	C	C	C	C	C	A	T	G	G	C	A	T	C	A	G	A
Hap_22	4	A	C	A	C	C	T	T	T	T	T	A	T	C	G	C	G	C	G	A	C	C	T	A	T	A	C	T	T	C	C	C	C	C	C	A	T	G	G	C	A	T	C	A	G	A
Hap_1	90	A	C	G	C	C	T	T	T	T	T	A	C	C	G	C	G	C	G	A	C	C	T	A	T	A	C	T	T	C	C	C	C	T	T	A	C	G	G	T	A	G	A	A	A	A
Hap_4	1	A	C	G	C	C	T	T	T	T	T	A	C	C	G	C	G	C	G	A	C	C	T	A	T	A	C	T	T	C	C	C	C	T	T	A	C	G	G	T	A	G	A	A	A	G
Hap_5	2	A	C	G	C	C	T	T	T	T	T	A	C	C	G	C	G	C	G	A	C	C	T	A	T	A	C	T	T	C	T	C	C	T	T	A	C	G	G	T	A	G	A	A	A	A
Hap_6	1	A	C	G	T	C	T	T	T	T	T	A	C	C	G	C	G	C	G	A	C	C	T	A	T	A	C	T	T	C	C	C	C	T	T	A	C	G	G	T	A	G	A	A	A	A
Hap_12	1	A	C	G	C	C	T	T	T	A	T	A	C	C	G	C	G	C	G	A	C	C	T	A	T	A	C	T	T	C	C	C	C	T	T	A	C	G	G	T	A	G	A	A	A	A
Hap_13	1	A	C	G	C	C	T	T	T	T	T	A	C	C	G	C	G	T	G	A	C	C	T	A	T	A	C	T	T	C	C	C	C	T	T	A	C	G	G	T	A	G	A	A	A	A
Hap_10	10	A	C	G	C	C	T	T	T	T	T	A	C	T	G	A	G	C	G	A	C	C	T	A	T	A	C	C	T	T	C	C	C	T	C	A	C	G	G	C	A	G	A	A	A	A
Hap_32	20	A	C	G	C	G	T	T	T	T	T	A	C	C	G	C	G	C	G	A	C	T	G	A	T	C	C	C	C	C	C	C	C	T	C	A	C	G	A	C	A	G	A	A	A	A
Hap_33	29	A	C	G	C	G	T	T	T	T	T	A	C	C	G	C	G	C	G	A	C	T	G	A	T	A	C	C	C	C	C	C	C	T	C	A	C	G	A	C	A	G	A	A	A	A
Hap_3	6	A	C	G	C	C	T	T	T	T	T	A	C	C	G	C	G	C	A	A	C	C	T	A	T	A	C	T	T	C	C	C	C	T	C	A	C	A	G	C	A	G	A	A	A	A
Hap_7	10	A	C	G	C	C	T	T	T	T	T	A	C	C	G	C	G	C	A	A	C	C	T	A	T	A	C	G	T	C	C	C	C	T	C	A	C	G	G	C	A	G	A	A	A	A
Hap_14	339	A	C	G	C	C	T	T	T	T	T	A	C	C	G	C	G	C	A	A	C	C	T	A	T	A	C	T	T	C	C	C	C	T	C	A	C	G	G	C	A	G	A	A	A	A
Hap_15	2	A	C	G	C	C	T	T	C	T	T	A	C	C	G	C	G	C	A	A	C	C	T	A	T	A	C	T	T	C	C	C	C	T	C	A	C	G	G	C	A	G	A	A	A	A
Hap_16	13	A	C	G	C	C	T	T	T	T	T	A	C	C	G	C	G	C	A	A	C	C	T	G	T	A	C	T	T	C	C	C	C	T	C	A	C	G	G	C	A	G	A	A	A	A
Hap_17	1	A	C	G	C	C	T	T	T	T	T	A	C	C	G	C	G	C	A	A	C	C	T	G	C	A	C	T	T	C	C	C	C	T	C	A	C	G	G	C	A	G	A	A	A	A
Hap_18	1	G	C	G	C	C	T	T	T	T	T	A	C	C	G	C	G	C	A	A	C	C	T	G	T	A	C	T	T	C	C	C	C	T	C	A	C	G	G	C	A	G	A	A	A	A
Hap_19	5	A	T	G	C	C	T	T	T	T	T	A	C	C	G	C	G	C	A	A	C	C	T	A	T	A	T	T	T	C	C	C	C	T	C	A	C	G	G	C	A	G	A	A	A	A
Hap_20	4	A	C	G	C	C	T	T	T	T	T	A	C	C	G	C	T	C	A	A	C	C	T	A	T	A	C	T	T	C	C	C	C	T	C	A	C	G	G	C	A	G	A	A	A	A
Hap_21	3	A	C	G	C	C	T	T	T	T	T	A	C	C	G	C	G	C	A	A	C	C	T	A	T	A	C	T	T	C	C	C	C	T	C	A	C	G	A	C	A	G	A	A	A	A
Hap_23	4	A	C	G	C	C	T	T	T	T	C	A	C	C	G	C	G	C	A	A	C	C	T	A	T	A	C	T	T	C	C	C	C	T	C	A	C	G	G	C	A	G	A	A	A	A
Hap_24	1	A	C	G	C	C	T	T	T	T	T	A	C	C	G	C	G	C	A	A	A	C	T	A	T	A	C	T	T	C	C	C	C	T	C	A	C	G	G	C	A	G	A	A	A	A
Hap_25	2	A	C	G	C	C	T	T	T	T	T	A	C	C	G	C	G	C	A	A	C	C	T	A	T	A	C	T	T	C	C	C	T	T	C	A	C	G	G	C	A	G	A	A	A	A
Hap_26	3	A	C	G	C	C	T	A	T	T	T	A	C	C	G	C	G	C	A	A	C	C	T	A	T	A	C	T	T	C	C	C	C	T	C	A	C	G	G	C	A	G	A	A	A	A
Hap_27	1	A	C	G	C	C	T	T	T	T	T	A	C	C	A	C	G	C	A	A	C	C	T	A	T	A	C	T	T	C	C	C	C	T	C	A	C	G	G	C	A	G	A	A	A	A
Hap_28	2	A	C	G	C	C	T	T	T	T	T	A	C	C	G	C	G	C	A	A	C	C	T	A	T	A	C	T	T	C	C	C	C	T	C	A	C	G	G	C	A	G	A	G	A	A
Hap_29	2	A	C	G	C	C	T	T	T	T	T	A	C	C	G	C	G	C	A	A	C	C	T	A	T	A	C	T	T	C	C	C	C	T	C	A	C	G	G	C	G	G	A	A	A	A
Hap_30	1	A	C	G	C	C	T	T	T	T	T	T	C	C	G	C	G	C	A	A	C	C	T	A	T	A	C	T	T	C	C	C	C	T	C	A	C	G	G	C	A	G	A	A	A	A
Hap_31	19	A	C	G	C	C	G	T	T	T	T	A	C	C	G	C	G	C	A	A	C	C	T	A	T	A	C	T	T	C	C	C	C	T	C	A	C	G	G	C	A	G	A	A	A	A
