# Supplementary material
Source: Frontiers journal article supplement (https://www.frontiersin.org/articles/519227)
Supplement: Table_3.XLSX [file Table_3.XLSX]

## Sheet: Sheet1
Supplementary Table S3. Pairwise Fst (below diagonal) and gene flow Nm (above diagonal, Nm=0.25*(1-Fst)/Fst estimates among Agarophyton vermiculophyllumpopulations. Pink, green, yellow and orange colors represent Fst > 0.25, 0.15 < Fst < 0.25, 0.05 < Fst < 0.15 and Nm>1, respectively. The bold indicates p < 0.001, and the underline indicates p < 0.05. Population numbers are the same as listed in …
	1	2	3	4	5	6	7	8	9	10	11	12	13	14	15	16	17	18	19	20	21	22	23	24	25	26	27	28	29	30	31	32	33	34	35	36	37	38	39	40	41	42	43	44	45	46	47	48
1		—	-1.60722	0.109195	—	-1.56027	-26.2917	-1.60722	—	0.0592146	0	0	0	0	0	-2.22006	-2.14394	0	0	0	0	0.0617596	0.0143824	0	0	0	0.0207093	0.031595	0	0.0224499	0.081697	0.23459	0	0	0.00757264	0	0	0.0143824	0	0.0429459	0.0491862	0.00925542	0	0	0	0	0	0
2	0		—	0.0625	—	-11.8187	0.813966	—	—	0.033556	0	0	0	0	0	9.10979	1.42853	0	0	0	0	0.0315886	0.0107127	0	0	0	0.0125003	0.0174169	0	0.0101836	0.0543177	0.107628	0	0	0.00566032	0	0	0.0107127	0	0.0314776	0.0354696	0.00651549	0	0	0	0	0	0
3	-0.1842	0		0.164477	—	11.0622	13.1118	—	-22.492	0.114974	0.0344821	0.0412463	0.0769213	0.0357143	0.0294108	34.5689	-5.36561	0.0688613	0.0872499	0.0525096	0.0546626	0.0904186	0.060837	0.0330456	0.110158	0.0570084	0.0694439	0.0963611	0.061348	0.121361	0.119227	0.207875	0.0486751	0.0872499	0.0551497	0.0570084	0.101124	0.060837	0.0654455	0.0842961	0.0892591	0.0644891	0.0546626	0.0505169	0.0366381	0.0148782	0.0168261	0.0278982
4	0.696	0.8	0.60317		0.0625	0.0610923	0.0911432	0.0714277	0.0663716	0.385179	0.035001	0.0408972	—	0.0364574	0.0291674	0.128186	0.110584	12.8596	-10.5891	3.75	4.20315	0.107505	3.95097	1.53725	-3.21419	4.80051	0.224996	0.739081	0.1259	-5.0716	2.55458	0.373379	3.10345	-10.5891	3.84635	4.80051	-4.50026	3.95097	8.86411	4.83337	2.01881	6.05517	4.20315	3.39272	0.112787	0.0143572	0.0164563	0.0272818
5	0	0	0	0.8		-11.8187	0.813966	—	—	0.033556	0	0	0	0	0	9.10979	1.42853	0	0	0	0	0.0315886	0.0107127	0	0	0	0.0125003	0.0174169	0	0.0101836	0.0543177	0.107628	0	0	0.00566032	0	0	0.0107127	0	0.0314776	0.0354696	0.00651549	0	0	0	0	0	0
6	-0.1908	-0.02161	0.0221	0.80362	-0.02161		1.11025	77.875	-8.35636	0.0358384	0.00314149	0.00361143	0.00733137	0.00366289	0.00274736	5.14258	1.86631	0.00668932	0.00810715	0.00530264	0.0054931	0.0302848	0.0146175	0.00349314	0.00964854	0.00569693	0.0161982	0.0218692	0.00578064	0.0178524	0.0535417	0.0946327	0.00495895	0.00810715	0.0100672	0.00569693	0.00907273	0.0146175	0.00641026	0.0332861	0.0368058	0.0114844	0.0054931	0.00512547	0.00384319	0.00165336	0.00186125	0.00288542
7	-0.0096	0.23497	0.01871	0.73283	0.23497	0.18379		1.43919	0.915719	0.0564777	0.00674732	0.00889297	0.0155704	0.00785956	0.00590894	2.96502	2.61993	0.0137186	0.0180017	0.0101186	0.0105795	0.0488715	0.0210556	0.00611343	0.0235529	0.0110884	0.0265762	0.0373233	0.0141924	0.0365921	0.0730225	0.15057	0.00930382	0.0180017	0.0155168	0.0110884	0.0213498	0.0210556	0.0129503	0.0439102	0.0487001	0.0183959	0.0105795	0.00969439	0.00731283	0.00314918	0.00353941	0.00633401
8	-0.1842	0	0	0.77778	0	0.0032	0.148		-22.492	0.0420663	0.00357027	0.00433385	0.00833385	0.00416578	0.00312611	7.54059	2.97622	0.0074957	0.00938453	0.00575971	0.00599017	0.0363524	0.0160424	0.00365002	0.0115802	0.00624206	0.0187507	0.0257982	0.00693731	0.0217155	0.0605706	0.114814	0.00534697	0.00938453	0.0110012	0.00624206	0.0107399	0.0160424	0.00713816	0.0367597	0.0408228	0.0127541	0.00599017	0.00554533	0.00416061	0.00178516	0.00200851	0.00330821
9	0	0	-0.01124	0.79021	0	-0.03084	0.21446	-0.01124		0.0357143	0	0	0	0	0	13.4787	1.73083	0	0	0	0	0.033907	0.011113	0	0	0	0.0132438	0.0185948	0	0.0110394	0.0569066	0.116048	0	0	0.00586965	0	0	0.011113	0	0.0326807	0.0368815	0.00680007	0	0	0	0	0	0
10	0.8085	0.88166	0.68498	0.39359	0.88166	0.87462	0.81572	0.85597	0.875		0.0159405	0.0197192	0.133553	0.0223846	0.01383	0.100086	0.0691421	0.118324	0.153682	0.0885057	0.0923626	0.0608718	0.123168	0.0545586	0.201565	0.0965772	0.0884599	0.15987	0.0541696	0.240619	0.289235	0.205656	0.081697	0.153682	0.103932	0.0965772	0.182048	0.123168	0.111988	0.202628	0.20688	0.122528	0.0923626	0.0849635	0.0378858	0.0085556	0.00983475	0.0166667
11	1	1	0.87879	0.87719	1	0.98759	0.97372	0.98592	1	0.94006		0	0	0	0	0.0246981	0.00873757	0	0	0	0	0.0808322	0.0053574	0	0	0	0.00714344	0.00920703	0	0.00510985	0.0275835	0.170833	0	0	0.00282916	0	0	0.0053574	0	0.0157567	0.0179615	0.00325688	0	0	0	0	0	0
12	1	1	0.85838	0.85941	1	0.98576	0.96565	0.98296	1	0.92689	1		0	0	0	0.0258347	0.0125003	0	0	0	0	0.0891348	0.00559759	0	0	0	0.00867599	0.0116185	0	0.00714344	0.0305269	0.200045	0	0	0.00295451	0	0	0.00559759	0	0.0165132	0.0190226	0.00352913	0	0	0	0	0	0
13	1	1	0.76471	0	1	0.97151	0.94137	0.96774	1	0.6518	1	1		0	0	0.0726806	0.0202235	—	—	—	—	0.0396368	90.0027	—	—	—	0.0500012	0.16086	0	1.42853	1.76824	0.19126	—	—	-6.55199	—	—	90.0027	—	14.3273	1.40893	-7.99954	—	—	0	0	0	0
14	1	1	0.875	0.87273	1	0.98556	0.96952	0.98361	1	0.91782	1	1	1		0	0.0297046	0.0101836	0	0	0	0	0.0240056	0.00642867	0	0	0	0.00833385	0.0109222	0	0.00612655	0.0329943	0.0731728	0	0	0.0033955	0	0	0.00642867	0	0.0189039	0.0215001	0.00390764	0	0	0	0	0	0
15	1	1	0.89474	0.89552	1	0.98913	0.97691	0.98765	1	0.94758	1	1	1	1		0.021394	0.00765227	0	0	0	0	0.0575674	0.00459286	0	0	0	0.00624994	0.00795534	0	0.00438302	0.0236937	0.328838	0	0	0.00242326	0	0	0.00459286	0	0.0135074	0.0154238	0.00279081	0	0	0	0	0	0
16	-0.1269	0.02671	0.00718	0.66105	0.02671	0.04636	0.07776	0.03209	0.01821	0.71411	0.91009	0.90634	0.77476	0.8938	0.92117		6.54902	0.0678922	0.0782951	0.0568351	0.0584135	0.0497854	0.063889	0.0405355	0.0891486	0.0600814	0.0591305	0.0797718	0.0462015	0.0951608	0.1057	0.116376	0.0539292	0.0782951	0.0592643	0.0600814	0.0850892	0.063889	0.0657443	0.0828983	0.0856606	0.0659198	0.0584135	0.0553435	0.0381645	0.014265	0.0161897	0.0224202
17	-0.132	0.14894	-0.04887	0.69332	0.14894	0.11813	0.08711	0.07749	0.12621	0.78335	0.96623	0.95238	0.92516	0.96086	0.9703	0.03677		0.0174884	0.0239816	0.0124479	0.0130748	0.0625352	0.02421	0.0072387	0.0333343	0.0137687	0.0325178	0.046898	0.0199988	0.0500012	0.0838274	0.190273	0.0113559	0.0239816	0.0181483	0.0137687	0.0294826	0.02421	0.0163797	0.0493438	0.0548632	0.0219017	0.0130748	0.0118761	0.00895197	0.00383803	0.00431315	0.00829381
18	1	1	0.78404	0.01907	1	0.97394	0.94798	0.97089	1	0.67875	1	1	0	1	1	0.78643	0.93462		—	—	—	0.0348548	15.0032	—	—	—	0.0448426	0.141175	0	1.07142	1.47712	0.166008	—	—	-9.19454	—	—	15.0032	—	7.7194	1.22206	-13.3322	—	—	0	0	0	0
19	1	1	0.74129	-0.02418	1	0.96859	0.93283	0.96382	1	0.6193	1	1	0	1	1	0.76151	0.91247	0		—	—	0.0459771	-16.3686	—	—	—	0.0565491	0.187499	0	2.22231	2.28653	0.226417	—	—	-4.69129	—	—	-16.3686	—	-151.765	1.71063	-5.21722	—	—	0	0	0	0
20	1	1	0.82642	0.0625	1	0.97923	0.9611	0.97748	1	0.73854	1	1	0	1	1	0.81477	0.95257	0	0		—	0.0256188	5.29447	—	—	—	0.0342977	0.103747	0	0.629384	1.03409	0.119544	—	—	-46.2059	—	—	5.29447	—	3.78291	0.909555	32.7315	—	—	0	0	0	0
21	1	1	0.82058	0.05614	1	0.9785	0.9594	0.9766	1	0.73022	1	1	0	1	1	0.8106	0.9503	0	0	0		0.0268028	5.84013	—	—	—	0.0356947	0.10851	0	0.67459	1.08526	0.125353	—	—	-29.906	—	—	5.84013	—	4.08802	0.947605	63.6886	—	—	0	0	0	0
22	0.8019	0.88782	0.73439	0.69929	0.88782	0.89195	0.83648	0.87305	0.88057	0.80419	0.75567	0.73717	0.86315	0.91239	0.81283	0.83393	0.79991	0.87764	0.84466	0.90705	0.90317		0.0306309	0.0154322	0.0607636	0.0280991	0.0430695	0.0563913	0.0432448	0.0686906	0.0666641	0.344022	0.0235439	0.0459771	0.0273002	0.0280991	0.0548297	0.0306309	0.0328758	0.0443947	0.0480555	0.032521	0.0268028	0.0245382	0.020513	0.0105415	0.0115583	0.020765
23	0.9456	0.95891	0.80428	0.05951	0.95891	0.94476	0.92232	0.9397	0.95744	0.66994	0.97902	0.9781	0.00277	0.97493	0.98196	0.79646	0.91171	0.01639	-0.01551	0.04509	0.04105	0.89085		2.46267	-4.09084	6.54532	0.0636055	0.188012	0.0196581	2.59998	1.13374	0.123988	4.50014	-16.3686	6.87454	6.54532	-5.99977	4.50014	11.0367	3.54997	1.04547	8.30286	5.84013	4.8583	0.024204	0.00295963	0.00338009	0.00476149
24	1	1	0.88325	0.13988	1	0.98622	0.97613	0.98561	1	0.82086	1	1	0	1	1	0.86048	0.97186	0	0	0	0	0.94186	0.09216		—	—	0.0216417	0.0627385	0	0.318531	0.623546	0.0707719	—	—	9.27381	—	—	2.46267	—	1.94935	0.5835	4.85308	—	—	0	0	0	0
25	1	1	0.69414	-0.08434	1	0.96284	0.9139	0.95573	1	0.55363	1	1	0	1	1	0.73714	0.88235	0	0	0	0	0.80447	-0.06509	0		—	0.0707554	0.254236	0	—	5.87895	0.320125	—	—	-2.63892	—	—	-4.09084	—	-5.0959	3.10751	-2.72721	—	—	0	0	0	0
26	1	1	0.81431	0.0495	1	0.97772	0.95753	0.97564	1	0.72134	1	1	0	1	1	0.80624	0.9478	0	0	0	0	0.89896	0.03679	0	0		0.0372078	0.113742	0	0.727288	1.14284	0.131767	—	—	-21.7092	—	—	6.54532	—	4.46342	0.989772	—	—	—	0	0	0	0
27	0.9235	0.95238	0.78261	0.52632	0.95238	0.93915	0.90391	0.93023	0.94969	0.73864	0.97222	0.96646	0.83333	0.96774	0.97561	0.80872	0.8849	0.84791	0.81553	0.87936	0.87506	0.85304	0.79718	0.92033	0.77941	0.87045		1.05412	0.0232449	0.0999979	0.188059	0.152953	0.031814	0.0565491	0.0487286	0.0372078	0.0652188	0.0636055	0.0426509	0.124672	0.131051	0.0567259	0.0356947	0.0330103	0.0165842	0.0035677	0.00401341	0.00662082
28	0.8878	0.93487	0.72179	0.25276	0.93487	0.91956	0.8701	0.90646	0.93077	0.60995	0.96448	0.95559	0.60848	0.95814	0.96916	0.7581	0.84204	0.6391	0.57143	0.70672	0.69733	0.81595	0.57076	0.79939	0.4958	0.6873	0.1917		0.0364968	0.345834	0.503852	0.223592	0.0953897	0.187499	0.145213	0.113742	0.226417	0.188012	0.133107	0.365673	0.348244	0.172497	0.10851	0.0993914	0.0272264	0.0043028	0.00488617	0.00849144
29	1	1	0.80296	0.66507	1	0.9774	0.94628	0.973	1	0.82191	1	1	1	1	1	0.84402	0.92593	1	1	1	1	0.85253	0.9271	1	1	1	0.91493	0.87261		0.0250003	0.105482	0.165552	0	0	0.0103678	0	0	0.0196581	0	0.058269	0.0655729	0.0123928	0	0	0	0	0	0
30	0.9176	0.96086	0.6732	-0.05185	0.96086	0.93335	0.87232	0.92008	0.95771	0.50956	0.97997	0.97222	0.14894	0.97608	0.98277	0.7243	0.83333	0.18919	0.10112	0.28429	0.27039	0.78446	0.08772	0.43973	0	0.25581	0.71429	0.41958	0.90909		-15.4846	0.336813	0.555568	2.22231	1.62042	0.727288	6	2.59998	0.955865	15.2491	2.05819	2.29764	0.67459	0.590054	0.0176373	0.00216611	0.00247425	0.00474851
31	0.7537	0.82151	0.67709	0.08914	0.82151	0.82361	0.77394	0.80497	0.81458	0.46362	0.90063	0.89118	0.12387	0.88341	0.91343	0.70284	0.74889	0.14475	0.09856	0.19469	0.18723	0.78948	0.18067	0.28619	0.04079	0.17949	0.5707	0.33163	0.70327	-0.01641		0.211212	0.946688	2.28653	1.07038	1.14284	3.62477	1.13374	1.3719	1.41025	1.00868	1.2844	1.08526	0.988175	0.107669	0.0151704	0.0174254	0.0262767
32	0.5159	0.69905	0.546	0.40104	0.69905	0.72541	0.62411	0.68528	0.68297	0.54866	0.59406	0.5555	0.56656	0.77358	0.4319	0.68236	0.56783	0.60095	0.52475	0.67651	0.66604	0.42086	0.66847	0.77937	0.4385	0.65485	0.62042	0.52788	0.60161	0.42603	0.54205		0.109433	0.226417	0.117237	0.131767	0.279998	0.123988	0.155824	0.152078	0.159373	0.141071	0.125353	0.114262	0.0816222	0.0292922	0.0327958	0.0595822
33	1	1	0.83703	0.07455	1	0.98055	0.96412	0.97906	1	0.7537	1	1	0	1	1	0.82256	0.95655	0	0	0	0	0.91393	0.05263	0	0	0	0.88711	0.72382	1	0.31034	0.20891	0.69554		—	—	—	—	4.50014	—	3.31227	0.843374	17.1474	—	—	0	0	0	0
34	1	1	0.74129	-0.02418	1	0.96859	0.93283	0.96382	1	0.6193	1	1	0	1	1	0.76151	0.91247	0	0	0	0	0.84466	-0.01551	0	0	0	0.81553	0.57143	1	0.10112	0.09856	0.52475	0		-4.69129	—	—	-16.3686	—	-151.765	1.71063	-5.21722	—	—	0	0	0	0
35	0.9706	0.97786	0.81927	0.06103	0.97786	0.96129	0.94156	0.95785	0.97706	0.70635	0.98881	0.98832	-0.03967	0.9866	0.9904	0.80837	0.93232	-0.02795	-0.05629	-0.00544	-0.00843	0.90155	0.03509	0.02625	-0.10465	-0.01165	0.83688	0.63257	0.96018	0.13366	0.18934	0.68076	0	-0.05629		-21.7092	-3.25698	6.87454	-11.0259	3.90628	0.980678	172.164	-29.906	-94.947	0.0128397	0.0015622	0.00178516	0.00251505
36	1	1	0.81431	0.0495	1	0.97772	0.95753	0.97564	1	0.72134	1	1	0	1	1	0.80624	0.9478	0	0	0	0	0.89896	0.03679	0	0	0	0.87045	0.6873	1	0.25581	0.17949	0.65485	0	0	-0.01165		—	6.54532	—	4.46342	0.989772	—	—	—	0	0	0	0
37	1	1	0.712	-0.05882	1	0.96498	0.92132	0.95881	1	0.57864	1	1	0	1	1	0.74607	0.89451	0	0	0	0	0.82013	-0.04348	0	0	0	0.7931	0.52475	1	0.04	0.06452	0.4717	0	0	-0.08314	0		-5.99977	—	-8.59446	2.34713	-3.42864	—	—	0	0	0	0
38	0.9456	0.95891	0.80428	0.05951	0.95891	0.94476	0.92232	0.9397	0.95744	0.66994	0.97902	0.9781	0.00277	0.97493	0.98196	0.79646	0.91171	0.01639	-0.01551	0.04509	0.04105	0.89085	0.05263	0.09216	-0.06509	0.03679	0.79718	0.57076	0.9271	0.08772	0.18067	0.66847	0.05263	-0.01551	0.03509	0.03679	-0.04348		11.0367	3.54997	1.04547	8.30286	5.84013	4.8583	0.024204	0.00295963	0.00338009	0.00476149
39	1	1	0.79253	0.02743	1	0.975	0.95075	0.97224	1	0.69063	1	1	0	1	1	0.79178	0.93851	0	0	0	0	0.88378	0.02215	0	0	0	0.85426	0.65256	1	0.20732	0.15414	0.61603	0	0	-0.0232	0	0	0.02215		6.42735	1.15111	-18.565	—	—	0	0	0	0
40	0.8534	0.88817	0.74784	0.04918	0.88817	0.8825	0.8506	0.87181	0.88439	0.55233	0.94071	0.93804	0.01715	0.9297	0.94874	0.75098	0.83516	0.03137	-0.00165	0.06199	0.05763	0.8492	0.06579	0.11367	-0.05159	0.05304	0.66725	0.40606	0.81098	0.01613	0.15058	0.62177	0.07018	-0.00165	0.06015	0.05304	-0.02996	0.06579	0.03744		1.31838	5.02093	4.08802	3.52815	0.0701967	0.00869473	0.009932	0.0140139
41	0.8356	0.87575	0.7369	0.11019	0.87575	0.87167	0.83696	0.85963	0.87144	0.54719	0.93297	0.92929	0.1507	0.92081	0.94189	0.7448	0.82004	0.16983	0.12751	0.2156	0.20875	0.83877	0.19298	0.29994	0.07446	0.20165	0.65608	0.41789	0.79221	0.10831	0.19862	0.61069	0.22865	0.12751	0.20314	0.20165	0.09626	0.19298	0.17843	0.1594		1.13912	0.947605	0.875011	0.0748652	0.00984015	0.0112276	0.0160254
42	0.9643	0.9746	0.79494	0.03965	0.9746	0.95608	0.93146	0.95146	0.97352	0.67109	0.98714	0.98608	-0.03226	0.98461	0.98896	0.79134	0.91945	-0.01911	-0.05033	0.00758	0.00391	0.88489	0.02923	0.04899	-0.10092	0	0.81506	0.59172	0.95277	0.09813	0.16293	0.63927	0.01437	-0.05033	0.00145	0	-0.07865	0.02923	-0.01365	0.04743	0.17997		63.6886	22.354	0.0141952	0.00172431	0.00197041	0.00291356
43	1	1	0.82058	0.05614	1	0.9785	0.9594	0.9766	1	0.73022	1	1	0	1	1	0.8106	0.9503	0	0	0	0	0.90317	0.04105	0	0	0	0.87506	0.69733	1	0.27039	0.18723	0.66604	0	0	-0.00843	0	0	0.04105	0	0.05763	0.20875	0.00391		—	0	0	0	0
44	1	1	0.8319	0.06863	1	0.97991	0.96267	0.9783	1	0.74635	1	1	0	1	1	0.81875	0.95465	0	0	0	0	0.91062	0.04894	0	0	0	0.88336	0.71553	1	0.2976	0.20191	0.68632	0	0	-0.00264	0	0	0.04894	0	0.06617	0.22222	0.01106	0		0	0	0	0
45	1	1	0.87218	0.68911	1	0.98486	0.97158	0.98363	1	0.8684	1	1	1	1	1	0.86756	0.96543	1	1	1	1	0.92417	0.91173	1	1	1	0.93779	0.90179	1	0.9341	0.69897	0.75387	1	1	0.95115	1	1	0.91173	1	0.78077	0.76955	0.94627	1	1		0	0	0
46	1	1	0.94383	0.94569	1	0.99343	0.98756	0.99291	1	0.96691	1	1	1	1	1	0.94602	0.98488	1	1	1	1	0.95954	0.9883	1	1	1	0.98593	0.98308	1	0.99141	0.94279	0.89512	1	1	0.99379	1	1	0.9883	1	0.96639	0.96213	0.99315	1	1	1		0	0
47	1	1	0.93694	0.93824	1	0.99261	0.98604	0.99203	1	0.96215	1	1	1	1	1	0.93918	0.98304	1	1	1	1	0.95581	0.98666	1	1	1	0.9842	0.98083	1	0.9902	0.93484	0.88403	1	1	0.99291	1	1	0.98666	1	0.96179	0.95702	0.99218	1	1	1	1		—
48	1	1	0.89961	0.90161	1	0.98859	0.97529	0.98694	1	0.9375	1	1	1	1	1	0.9177	0.96789	1	1	1	1	0.92331	0.98131	1	1	1	0.9742	0.96715	1	0.98136	0.90489	0.80754	1	1	0.99004	1	1	0.98131	1	0.94692	0.93976	0.98848	1	1	1	1	0
